# Supplementary material
Source: PubMed Central journal article supplement (PMC4664117)
Supplement: supp_mjv028_mjv028supp.pdf [file supp_mjv028_mjv028supp.pdf]

## Supplementary Figure S1 *In vitro* study of INH7/INH1 with T47D cells

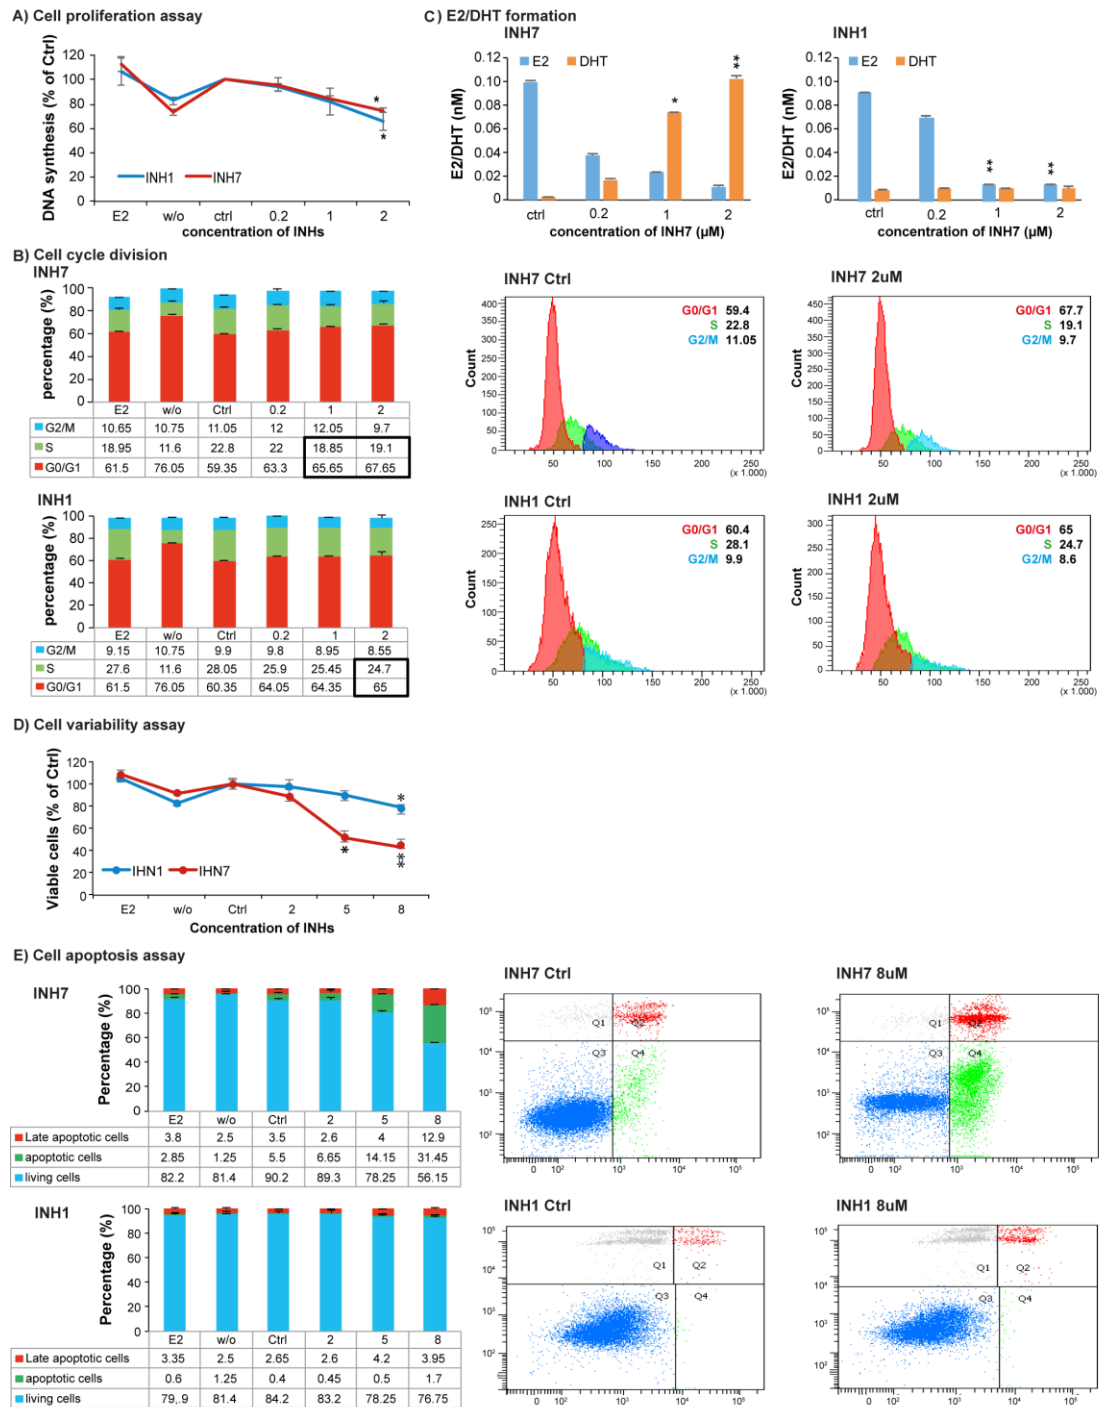

## Supplementary Figure S1 *In vitro* study of INH7/INH1 with T47D cells

(A) Cell proliferation assay of T47D treated with INH7 or INH1. Data are reported as % of DNA synthesis vs. control (100%). Each point represents the mean of experiments carried out in quadruplicate (mean  $\pm$  SD). Statistical significance by Student's test: \*  $p < 0.05$  vs. control (Ctrl).

(B) Cell cycle analysis of T47D cells treated with INH7 or INH1. Data are reported as % of living cells ( $G_0/G_1$ , S and  $G_2/M$  cells = 100%). Each number represents the mean of experiments carried out in triplicate (mean  $\pm$  SD). Statistical significance ( $P < 0.05$ ) by Student's test is highlighted in bold box in table.

(C) E2 and DHT formation in T47D cells treated with INH7 or INH1. Each bar represents the mean of experiments carried out in quadruplicate (mean  $\pm$  SD). Statistical significance by Student's test: \*  $p < 0.05$  vs. control (Ctrl); \*\*  $P < 0.001$  vs. Ctrl.

(D) Cell viability of T47D treated with INH7 or INH1 by MTT assay Each data point represents the mean of experiments carried out in quadruplicate (mean  $\pm$  SD). Statistical significance by student test: \* $p < 0.05$  vs. Ctrl. \*\*  $p < 0.001$  vs. Ctrl.

(E) Cell apoptosis of T47D treated with after treatment with INH7 or INH1. Each data point represents the mean of experiments carried out in triplicate (mean  $\pm$  SD). Statistical significance ( $p < 0.05$ ) by Student's test is highlighted in bold box in table. Flow cytometry figures represent the distribution of each cell type after treatment.

## Supplementary Figure S2 *In vitro* study of INH7/INH1 with BT-20 cells

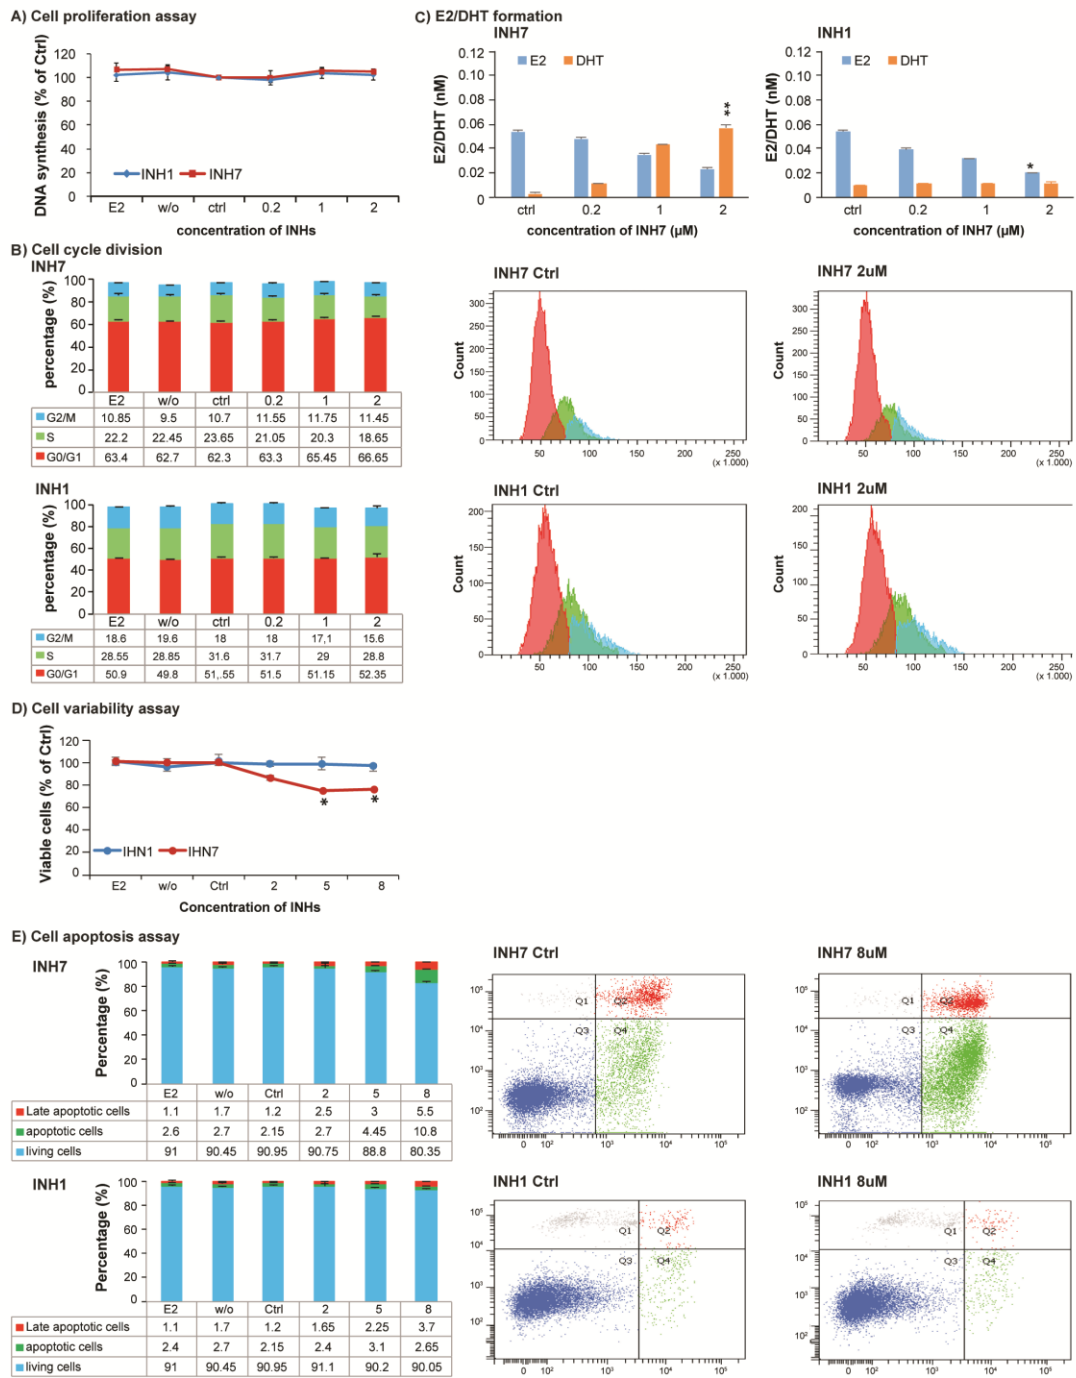

## Supplementary Figure S2 *In vitro* study of INH7/INH1 with BT-20 cells

(A) Cell proliferation assay of BT20 treated with INH7 or INH1. Data are reported as % of DNA synthesis vs. control (100%). Each point represents the mean of experiments carried out in quadruplicate (mean  $\pm$  SD). Statistical significance by Student's test: \*  $p < 0.05$  vs. control (Ctrl).

(B) Cell cycle analysis of BT20 cells treated with INH7 or INH1. Data are reported as % of living cells ( $G_0/G_1$ , S and  $G_2/M$  cells = 100%). Each number represents the mean of experiments carried out in triplicate (mean  $\pm$  SD). Statistical significance ( $P < 0.05$ ) by Student's test is highlighted in bold box in table.

(C) E2 and DHT formation in BT20 cells treated with INH7 or INH1. Each bar represents the mean of experiments carried out in quadruplicate (mean  $\pm$  SD). Statistical significance by Student's test: \*  $p < 0.05$  vs. control (Ctrl); \*\*  $P < 0.001$  vs. Ctrl.

(D) Cell viability of BT20 treated with INH7 or INH1 by MTT assay Each data point represents the mean of experiments carried out in quadruplicate (mean  $\pm$  SD). Statistical significance by student test: \* $p < 0.05$  vs. Ctrl. \*\*  $p < 0.001$  vs. Ctrl.

(E) Cell apoptosis of BT20 treated with after treatment with INH7 or INH1. Each data point represents the mean of experiments carried out in triplicate (mean  $\pm$  SD). Statistical significance ( $p < 0.05$ ) by Student's test is highlighted in bold box in table. Flow cytometry figures represent the distribution of each cell type after treatment.
